# Supplementary material for: Associations Between Hematologic Profiles and Depressive Disorder in Adolescents
Source: Research Square preprint supplement (doi:10.21203/rs.3.rs-8434228/v1), 2025-12-31
Supplement: Supplementary file 1 [file 2ec61f874c62a1096fc7a988.docx]

**Supplementary Information for**

# article title : Associations Between Hematologic Profiles and Depressive Disorder in Adolescents

author names : Kang Yoon Jung, MD a, Jong-Hyun Jeong, MD, PhD b, HyeJin Tae, MD, PhD c, Yoo Hyun Um, MD, PhD b, Jae Hyun Yoo, MD, PhD a *

a Department of Psychiatry, Seoul St. Mary’s Hospital, College of Medicine, The Catholic University of Korea, 222, Banpo-daero, Seocho-gu, Seoul, 06591, Republic of Korea

b Department of Psychiatry, St. Vincent’s Hospital, College of Medicine, The Catholic University of Korea, 93, Jungbu-daero, Paldal-gu, Suwon-si, Gyeonggi-do, 16247, Republic of Korea

c Health Promotion Center, Seoul St. Mary’s Hospital, College of Medicine, The Catholic University of Korea, 222, Banpo-daero, Seocho-gu, Seoul, 06591, Republic of Korea

affiliation and e-mail address of the corresponding author : : Jae Hyun Yoo, Department of Psychiatry, Seoul St. Mary’s Hospital, College of Medicine, The Catholic University of Korea, 222 Banpo-daero, Seocho-gu, Seoul 06591, Korea, Tel: +82-2-2258-6773, Fax: +82-2-594-3870, E-mail: jay.yoo84@gmail.com

**Table S1. International Classification of Disease (ICD) codes for identification of depressive disorder from Electronic Health Record**

**Table S2. Bivariate correlations between demographic variables and hematologic variables**

**Table S3. Group comparison of demographic variables in female subjects**

**Table S4. Group comparison of hematologic variables in female subjects**

**Table S5. Group comparison of demographic variables in male subjects**

**Table S6. Group comparison of hematologic variables in male subjects**

Table S1. International Classification of Disease (ICD) codes for identification of depressive disorder from Electronic Health Record

| ICD-10 (1997-) |
| --- |
| F320 : Mild depressive episode  F321 : Moderate depressive episode  F322 : Severe depressive episode without psychotic symptoms  F323 : Severe depressive episode with psychotic symptoms  F328 : Other depressive episodes  F329 : Depressive episode, unspecified  F330 : Recurrent depressive disorder, current episode mild  F331 : Recurrent depressive disorder, current episode moderate  F332 : Recurrent depressive disorder, current episode severe without psychotic symptoms  F333 : Recurrent depressive disorder, current episode severe with psychotic symptoms  F334 : Recurrent depressive disorder, currently in remission  F339 : Recurrent depressive disorder, unspecified  F341 : Dysthymia  F349 : Persistent mood disorder, unspecified  F380 : Other single mood disorders  F381 : Other recurrent mood disorders  F388 : Other specified mood disorders  F39 : Unspecified mood disorders |

|  | **1** | **2** | **3** | **4** | **5** | **6** | **7** | **8** | **9** | **10** | **11** | **12** | **13** | **14** | **15** | **16** | **17** | **18** | **19** | **20** |
| --- | --- | --- | --- | --- | --- | --- | --- | --- | --- | --- | --- | --- | --- | --- | --- | --- | --- | --- | --- | --- |
| **1** | - |  |  |  |  |  |  |  |  |  |  |  |  |  |  |  |  |  |  |  |
| **2** | 0.28*** | - |  |  |  |  |  |  |  |  |  |  |  |  |  |  |  |  |  |  |
| **3** | 0.15*** | 0.53*** | - |  |  |  |  |  |  |  |  |  |  |  |  |  |  |  |  |  |
| **4** | -0.03 | -0.27*** | 0.34*** | - |  |  |  |  |  |  |  |  |  |  |  |  |  |  |  |  |
| **5** | -0.01 | 0 | 0.23*** | 0.07 | - |  |  |  |  |  |  |  |  |  |  |  |  |  |  |  |
| **6** | 0.20*** | 0.39*** | 0.34*** | 0.05 | 0.13*** | - |  |  |  |  |  |  |  |  |  |  |  |  |  |  |
| **7** | 0.21*** | 0.40*** | 0.36*** | 0.06* | 0.15*** | 0.96*** | - |  |  |  |  |  |  |  |  |  |  |  |  |  |
| **8** | -0.17*** | -0.07* | -0.13*** | -0.04 | -0.36*** | -0.12*** | -0.15*** | - |  |  |  |  |  |  |  |  |  |  |  |  |
| **9** | -0.08** | 0.04 | 0.03 | 0.03 | 0 | 0.03 | 0.03 | 0 | - |  |  |  |  |  |  |  |  |  |  |  |
| **10** | 0.26*** | 0.10** | 0.02 | -0.01 | -0.03 | 0.25*** | 0.25*** | -0.05 | -0.12*** | - |  |  |  |  |  |  |  |  |  |  |
| **11** | 0.06* | 0.08* | 0.06 | 0 | -0.18*** | -0.01 | -0.01 | -0.01 | 0.13*** | -0.07** | - |  |  |  |  |  |  |  |  |  |
| **12** | 0.04 | 0.13*** | 0.07 | -0.02 | 0.02 | 0.61*** | 0.37*** | 0.01 | 0.03 | 0.19*** | -0.02 | - |  |  |  |  |  |  |  |  |
| **13** | 0.07* | 0.03 | 0.21*** | 0.06 | 0.89*** | 0.14*** | 0.16*** | -0.70*** | -0.13*** | 0.02 | -0.23*** | 0 | - |  |  |  |  |  |  |  |
| **14** | 0.03 | 0.23*** | 0.29*** | 0.07* | 0.16*** | 0.81*** | 0.85*** | -0.11*** | 0.10*** | -0.29*** | 0.03 | 0.27*** | 0.15*** | - |  |  |  |  |  |  |
| **15** | 0.23*** | 0.14*** | 0.05 | -0.02 | -0.02 | 0.50*** | 0.37*** | -0.03 | -0.08** | 0.87*** | -0.06* | 0.65*** | 0.01 | -0.10*** | - |  |  |  |  |  |
| **16** | -0.14*** | -0.17*** | 0.02 | 0.03 | 0.32*** | -0.17*** | -0.14*** | -0.11*** | 0.01 | -0.24*** | -0.09** | -0.20*** | 0.28*** | -0.01 | -0.28*** | - |  |  |  |  |
| **17** | 0.17*** | 0.04 | 0.11** | 0.03 | 0.39*** | 0.11*** | 0.14*** | -0.94*** | -0.26*** | 0.09*** | -0.23*** | -0.01 | 0.75*** | 0.08** | 0.07* | 0.12*** | - |  |  |  |
| **18** | 0.02 | 0.07** | -0.03 | -0.04 | -0.16*** | 0.03 | 0.06* | 0.05 | 0.26*** | -0.03 | 0.12*** | -0.07** | -0.19*** | 0.08** | -0.06* | 0.02 | -0.16*** | - |  |  |
| **19** | 0.15*** | 0.07 | 0.10** | 0.03 | 0.38*** | 0.10*** | 0.13*** | -0.95*** | -0.12*** | 0.07** | -0.07** | -0.01 | 0.73*** | 0.08** | 0.05 | 0.09*** | 0.94*** | -0.09*** | - |  |
| **20** | 0.03 | -0.04 | 0.10** | 0.04 | 0.46*** | -0.02 | 0.02 | -0.74*** | 0 | -0.11*** | -0.03 | -0.13*** | 0.68*** | 0.07** | -0.15*** | 0.69*** | 0.71*** | -0.02 | 0.76*** | - |

Table S2. Bivariate correlations between demographic variables and hematologic variables

1 = Age, 2 = Height, 3 = Weight, 4 = BMI, 5 = WBC count (109/L), 6 = Hemoglobin (g/dl), 7 = Hematocrit (%), 8 = LC (%), 9 = Eosinophils (%),10 = MCV (fl), 11 = Monocytes (%), 12 = MCHC (%), 13 = ANC (109/L), 14 = RBC count (1012/L), 15 = MCH (pg), 16 = PLT (109/L), 17 = NC (%), 18 = Basophils (%), 19 = NLR, 20 = PLR

Asterisk indicates * p<0.05, ** p<0.01, *** p<0.001; BMI = Body Mass Index; HAMD = Hamilton Depression Rating Scale; RBC count = Red Blood Cell count; WBC count = White Blood Cell count; ANC = Absolute Neutrophil Count; NC = Seg Neutrophils count; LC = Lymphocytes count; MCV = Mean Corpuscular Volume; MCHC = Mean Corpuscular Hemoglobin Concentration; MCH = Mean Corpuscular Hemoglobin; PLT = Platelet count; NLR = Neutrophil-to-Lymphocyte Ratio; PLR = Platelet-to-Lymphocyte Ratio

Table S3. Group comparison of demographic variables in female subjects

|  | Control Group  (n=691) | Depression Group  (n=645) | p value |
| --- | --- | --- | --- |
| Age, yr | 17.24±1.72 | 15.83±1.56 | <0.001*** |
| Height | 161.26±7.11 | 160.15±7.21 | 0.021* |
| Weight | 53.26±8.80 | 56.83±13.59 | <0.001*** |
| BMI | 20.39±2.65 | 22.05±4.68 | <0.001*** |
| HAMD |  | 20.49±5.45 |  |

Asterisk indicates * p<0.05, ** p<0.01, *** p<0.001

BMI = Body Mass Index; HAMD = Hamilton Depression Rating Scale

Table S4. Group comparison of hematologic variables in female subjects

|  | Control Group  (n=691) | Depression Group (n=645) | p value | Adjusted  p value |
| --- | --- | --- | --- | --- |
| RBC count (1012/L) | 4.59±0.35 | 4.41±0.35 | <0.001*** | <0.001*** |
| Hemoglobin (g/dl) | 13.34±0.92 | 12.71±1.22 | <0.001*** | <0.001*** |
| Hematocrit (%) | 40.34±2.40 | 38.80±3.17 | <0.001*** | <0.001*** |
| MCV (fl) | 87.44±5.46 | 88.11±5.44 | 0.124 | 0.500 |
| MCHC (%) | 33.12±1.01 | 32.72±1.20 | <0.001*** | <0.001*** |
| MCH (pg) | 28.97±2.10 | 28.86±2.32 | 0.499 | 0.031* |
| WBC count (109/L) | 6.36±1.58 | 6.71±1.69 | 0.007** | 0.507 |
| LC (%) | 38.91±9.15 | 38.40±8.58 | 0.501 | 0.080 |
| NC (%) | 50.76±9.79 | 51.19±9.11 | 0.599 | 0.026* |
| ANC (109/L) | 3.21±1.13 | 3.50±1.28 | 0.003** | 0.888 |
| Basophils (%) | 0.49±0.31 | 0.45±0.25 | 0.164 | 0.327 |
| Monocytes (%) | 7.10±2.21 | 7.28±1.68 | 0.333 | 0.002** |
| Eosinophils (%) | 2.71±2.01 | 2.66±1.96 | 0.659 | 0.965 |
| PLT (109/L) | 277.31±54.20 | 283.27±57.57 | 0.177 | 0.856 |
| NLR | 1.44±0.59 | 1.46±0.59 | 0.666 | 0.132 |
| PLR | 7.55±2.53 | 7.80±2.53 | 0.241 | 0.583 |

Asterisk indicates * p<0.05, ** p<0.01, *** p<0.001

RBC count = Red Blood Cell count; WBC count = White Blood Cell count; ANC = Absolute Neutrophil Count; NC = Seg Neutrophils count; LC = Lymphocytes count; MCV = Mean Corpuscular Volume; MCHC = Mean Corpuscular Hemoglobin Concentration; MCH = Mean Corpuscular Hemoglobin; PLT = Platelet count; NLR = Neutrophil-to-Lymphocyte Ratio; PLR = Platelet-to-Lymphocyte Ratio

Table S5. Group comparison of demographic variables in male subjects

|  | Control Group  (n=529) | Depression Group (n=429) | p value |
| --- | --- | --- | --- |
| Age, yr | 17.13±1.64 | 16.38±1.58 | <0.001*** |
| Height | 172.09±11.85 | 170.15±11.31 | 0.052 |
| Weight | 68.60±14.33 | 68.20±19.27 | 0.791 |
| BMI | 25.42±46.92 | 23.52±8.59 | 0.482 |
| HAMD |  | 18.39±5.18 |  |

Asterisk indicates * p<0.05, ** p<0.01, *** p<0.001

BMI = Body Mass Index; HAMD = Hamilton Depression Rating Scale

Table S6. Group comparison of hematologic variables in male subjects

|  | Control Group  (n=529) | Depression Group (n=429) | p value | Adjusted  p value |
| --- | --- | --- | --- | --- |
| RBC count (1012/L) | 5.17±0.30 | 5.14±0.36 | 0.262 | 0.030* |
| Hemoglobin (g/dl) | 15.56±0.91 | 15.30±1.11 | <0.001*** | 0.019* |
| Hematocrit (%) | 46.21±2.63 | 45.36±2.97 | <0.001*** | 0.010* |
| MCV (fl) | 87.21±4.45 | 88.33±3.84 | 0.002** | 0.012* |
| MCHC (%) | 33.74±0.97 | 33.73±1.09 | 0.957 | 0.809 |
| MCH (pg) | 29.42±1.65 | 29.79±1.52 | 0.007** | 0.056 |
| WBC count (109/L) | 6.44±1.55 | 6.76±1.71 | 0.021* | 0.019* |
| LC (%) | 39.37±8.15 | 37.50±8.36 | 0.012* | 0.964 |
| NC (%) | 49.35±8.79 | 51.34±8.70 | 0.012* | 0.930 |
| ANC (109/L) | 3.20±1.10 | 3.53±1.22 | 0.001** | 0.106 |
| Basophils (%) | 0.51±0.29 | 0.47±0.28 | 0.148 | 0.206 |
| Monocytes (%) | 7.55±2.02 | 7.68±1.82 | 0.457 | 0.885 |
| Eosinophils (%) | 3.22±2.04 | 3.01±2.21 | 0.259 | 0.917 |
| PLT (109/L) | 253.53±47.73 | 264.53±55.32 | 0.010* | 0.207 |
| NLR | 1.36±0.53 | 1.49±0.59 | 0.006** | 0.770 |
| PLR | 6.81±2.15 | 7.50±2.48 | 0.001** | 0.320 |

Asterisk indicates * p<0.05, ** p<0.01, *** p<0.001

RBC count = Red Blood Cell count; WBC count = White Blood Cell count; ANC = Absolute Neutrophil Count; MCV = Mean Corpuscular Volume; MCHC = Mean Corpuscular Hemoglobin Concentration; MCH = Mean Corpuscular Hemoglobin; NLR = Neutrophil-to-Lymphocyte Ratio; PLR = Platelet-to-Lymphocyte Ratio
